# Supplementary material for: Base promoted isomerization of aziridinyl ethers: a new access to α- and β-amino acidsElectronic supplementary information (ESI) available: experimental procedures and NMR data. See http://www.rsc.org/suppdata/cc/b2/b200708h/.
Source: Royal Society of Chemistry journal article supplement (doi:10.1039/b200708h), 2002-03-12
Supplement: b200708h.doc [file b200708h.doc]

# Supplementary data

# Supporting informations for “Base promoted isomerization of aziridinyl ethers: a new access to - and -aminoacids”

**General Procedures.** Air- and moisture-sensitive compounds were stored in Schlenk tubes or in Schlenk burettes. They were protected by and handled under an atmosphere of 99.99% pure nitrogen. Ethereal extracts were dried with sodium sulfate. The temperature of dry ice-ethanol baths is consistently indicated as -78 °C, that of ice bath as 0°C and "room temperature" as 25 °C. Purifications by flash column chromatography were performed using glass columns (10-50 mm wide); silica gel 230-400 mesh was chosen as stationary phase (15 cm high), with an elution rate of 5 cm/min. Nuclear magnetic resonance spectra of hydrogen nuclei were recorded at 200 MHz. Chemical shifts were determined relative to the residual solvent peak (CHCl3: 7.26 ppm). Coupling constants (*J*) are measured in Hz. Coupling patterns are described by abbreviations: s (singlet), d (doublet), t (triplet), q (quartet), quint (quintet), dd (doublet of a doublet), m (multiplet), bs (broad singlet). Nuclear magnetic resonance spectra of carbon-13 nuclei were recorded at 50.3 MHz. Chemical shifts were determined relative to the residual solvent peak (CHCl3: 77.0 ppm). Mass spectra were obtained at a 70 eV ionization potential.

**Materials.** Starting materials were commercially available unless otherwise stated. All commercial reagents were used without further purification except diisopropyl amine, which was distilled over calcium hydride. Anhydrous tetrahydrofuran was distilled from sodium diphenylketyl. Dimethylformamide was distilled over calcium hydride and then stored over 4-Å molecular sieves. Methylene chloride was dried over calcium chloride and stored over 4-Å molecular sieves. Petroleum ether, unless specified, was the 40-70 °C boiling fraction.

# 1. Preparation of Aziridinyl Ethers

**(2*S*,3*S*)-2,3-Eoxyoctanol**. Molecular sieves 4 Å (0.6 g), CH2Cl2 (70 mL), (l)-(+)-diethyl tartrate (266 mg, 1.3 mmol) and Ti(O*i*Pr)4 (412 mg, 1.44 mmol) were mixed under N2 and cooled to –23°C. *t*BuOOH (7.4 mL of a 5.5 M solution in decane, dried over molecular sieves 4 Å, 40.6 mmol) was then slowly added and the mixture maintained at –20°C for 30 min before (*E*)-2-octenol (2.56 g, 20 mmol) was added. After 18 h a solution obtained by dissolving 3.55 g of FeSO4 and 1.35 g citric acid in 10 mL of H2O and cooled at 0°C was added and the mixture warmed up to room temperature. The two phases, which were formed after stirring, were separated; the water phase was extracted with Et2O and the organic phases were added to a solution obtained by dissolving 0.5 g of NaCl and 3.0 g of NaOH in 9.0 mL of H2O. After 45 min of vigorous stirring the two phases were separated, the water phase was extracted with Et2O and the organic layers were combined and dried. Evaporation of the solvent gave 2.33 g of the desired product (81%, 85% ee determined *via* Mosher ester). **1H-NMR**  (CDCl3, 200 MHz): 3.90 (1 H, dd, *J*=12.8, 2.6); 3.60 (1 H, dd, *J*=12.8, 4.4); 2.94 (2 H, m); 2.20 (1 H, bs); 1.54 (2 H, m); 1.30 (6 H, m); 0.90 (3 H, t, *J*=6.6). **13C-NMR**  (CDCl3, 50 MHz): 61.7; 58.6; 56.0; 31.5; 31.5; 25.6; 25.6; 13.9. **MS** *m/z* (%): 101 (4, M+-C3H7); 83 (95); 71 (10); 69 (12); 61 (11); 57 (67); 56 (44); 55 (100).

**(2*S*,3*S*)-1-Methoxymethoxy-2,3-epoxyoctane 10a**. To a solution of (2*S*,3*S*)-2,3-epoxyoctanol (927 mg, 6.4 mmol) in CH2Cl2 (40 mL) at 0 °C, *N*,*N*-diisopropylethylamine (2.2 mL, 12.8 mmol) and chloromethyl methyl ether (0.73 mL, 9.6 mmol) were added under N2. The mixture was stirred at room temperature for 12 h and then washed with 10% HCl, sat NaHCO3 and brine. The organic layer was dried over anhydrous Na2SO4. Evaporation of the solvent gave the oxiranyl ether **10a** (1.04 g, 87%).**1H-NMR**  (CDCl3, 200 MHz): 4.64 (2 H, s); 3.73 (1 H, dd, *J*=11.4, 5.4); 3.53 (1 H, dd, *J*=11.4, 3.4); 3.37 (3 H, s); 2.92 (1 H, ddd, *J*=5.4, 3.4, 2.4); 2.83 (1 H, ddd, *J*=6.1, 5.4, 2.4); 1.5 (2 H, m); 1.3 (6 H, m); 0.87 (3 H, t, *J*=7.2).

**(2*R*,3*R*)-1-Methoxymethoxy-2-hydroxy-3-azidooctane, (2*R*,3*S*)-1-methoxymethoxy-3-hydroxy-2-azidooctane 11a**. To the oxiranyl ether **10a** (1.65 g, 8.7 mmol) in 2-methoxyethanol : water, 8:1 (55 mL), NaN3 (3.45 g, 53 mmol) and NH4Cl (0.96 g, 18 mmol) were added under N2. The mixture was stirred at 80 °C for 12 hours then H2O (30 mL) and Et2O (100 mL) were added. The two phases were separated; the water phase was extracted with Et2O, and the organic layers were washed with H2O, dried and evaporated. The resulting azido alcohol was purified by flash chromatography (petroleum ether: AcOEt, 2:1) affording 1.21 g (60%) of a mixture of regio isomers. **1H-NMR**  (CDCl3 200 MHz): 4.65 (2H, s); 3.7 (4H,m); 3.37 (3H, s); 2.82 (1H, bs); 1.5 (2H, m); 1.29 (6H, m); 0.88 (3H, t, *J*= 6.6). **MS** *m/z(%)*: 105 (33, CH3OCH2OCH2CH=OH+); 98 (11); 87 (8); 75 (13); 73 (100); 71 (15); 57 (22); 56 (17); 55 (25).

**(2*R*,3*R*)-1-Methoxymethoxy-2-methansulfonyloxy-3-azidooctane, (2*R*,3*S*)-1-methoxymethoxy-3-methansulfonyloxy-2-azidooctane.** The mixture of (2*R*,3*R*)-1-methoxymethoxy-2-hydroxy-3-azidooctane and (2*R*,3*S*)-1-methoxymethoxy-3-hydroxy-2-azidooctane (1.62 g, 7.0 mmol) and anhydrous pyridine (16 mL) were mixed under N2 and cooled at 0°C. Methanesulfonyl chloride (985 mg, 8.6 mmol) was added and the mixture stirred at room temperature for 24 h before Et2O was added (16 mL). The mixture was then washed with sat CuSO4 (4-5 times), H2O, dried and evaporate, giving 1.73 g (80%) as a mixture of mesylated azido alcohols. **1H-NMR**  (CDCl3, 200 MHz): 4.69 (1H, dt, *J*=5.6, 4.6); 4.65 (2H, s); 3.79 (1H, d, *J*= 1.2); 3.76 (1H, m); 3.70 (1H, m); 3.37 (3H, s); 3.10 (3H, s); 1.6-1.1 (8H, m); 0.89 (3H, m).

**(2*S*,3*R*)-2-Methoxymethoxymethyl-3-pentylaziridine 12a**. The mixture of (2*R*,3*R*)-1-methoxymethoxy-2-methansulfonyloxy-3-azidooctane and (2*R*,3*S*)-1-methoxymethoxy-3-methansulfonyloxy-2-azidooctane (0.36 g, 1.18 mmol) in THF (5 mL) was stirred under N2 at 0°C. LiAlH4 (3.5 mmol) was added and the reaction mixture was allowed to warm to room temperature. After 2h it was warmed up to 50°C for 12 h. The reaction was then quenched with H2O and aqueous NH4Cl, after cooling to 0°C. The mixture was filtered over Celite® and the organic layer was dried. The evaporation of the solvent gave 0.209 g (94%) of the desired aziridine **12a**. **1H-NMR**  (CDCl3, 200 MHz): 4.62 (2H, s); 3.63 (1H, dd, *J* = 10.8, 4.6); 3.43 (1H, dd, *J* = 10.8, 6); 3.35-3.34 (1H ,m); 3.33 (3H, s); 1.85 (1H, m); 1.78 (1H, m); 1.40 (2H, m); 1.25 (6H,m); 0.89 (3H, m). **MS** *m/z (%)*: 188 (2, M++1); 156 (2, M+-CH3O); 142 (4, M+-CH3OCH2); 126 (52, M+-CH3OCH2O); 112 (53, M+-CH2OMOM); 82 (34); 69 (100); 56 (86).

**(2*S*,3*R*)-2-Methoxymethoxymethyl-3-pentyl-1-benzylaziridine 7a**. A precooled solution of aziridine **12a** (560 mg, 3 mmol ) in THF (5 mL) was added to NaH (144 mg, 6 mmol) suspended in THF (5 mL) at –20°C. After 15 min, benzyl bromide (770 mg, 5 mmol) was added, and the reaction mixture was stirred for 15 h at 25 °C before it was treated with water-ice and extracted with ether. The organic phase was washed with brine and dried. Evaporation of the solvent gave 741mg (89%) of benzyl aziridine **7a**. **1H-NMR**  (CDCl3, 200 MHz): 7.5-7.1 (5H, m); 4.63 (2H, m); 4.05-3.65 (2H, m); 3.52 (2H, m); 3.31 (3H, s), 2.18 (1H, m); 1.97 (1H, m); 1.8-1.0 (8H, m); 0.6-1.0 (3H, m).

**(2*S*,3*R*)-2-Methoxymethoxymethyl-3-pentyl-1-*tert*-butoxycarbonylaziridine 8a**. Aziridine **12a** (0.38 g, 2 mmol), CH2Cl2 (3 mL), 4-(dimethylamino)pyridine (0.6 g, 5.27 mmol) and di-*tert*-butyl dicarbonate (1.09 g, 5.27 mmol) were stirred under N2 at 25 °C for 2 h, before aq NH4Cl and H2O were added. The water phase was extracted with Et2O, and the organic layers were combined, washed with sat KHSO4, sat Na2CO3, brine and then dried. The solvent was evaporated under reduced pressure. The crude was purified by flash chromatography (petroleum ether : AcOEt, 1:6) affording 288 mg (54%) of *N*-BOC aziridine **8a**. **1H-NMR**  (CDCl3, 200 MHz): 4.61 (2H, s); 3.75 (1H, dd, *J* = 11.0, 4.4); 3.54 (1H, dd, *J*=11.0, 4.0); 3.34 (3H, s); 2.39 ( 2H, m); 1.49 (9H, s); 1.4-1.2 (8H, m); 0.75 (3H, m).

**(2*S*,3*R*)-2-Methoxymethoxymethyl-3-pentyl-1-*p*-toluenesulfonylaziridine 9a**. To a solution of aziridine **12a** (0.807 g, 4.31 mmol) in anhydrous pyridine (40 mL) at 0°C, *p*-toluenesulfonyl chloride (0.820 g , 4.3 mmol) was added under N2. The reaction mixture was stirred at 0°C for 20 min before Et2O was added. The mixture was then washed with sat CuSO4 solution, H2O, dried and the solvent removed under vacuum. The crude product was purified by flash chromatography (petroleum ether : AcOEt, 6:1) giving 0.965 g (65%) of pure **9a**. **1H-NMR**  (CDCl3, 200 MHz): 7.84 (2H, m); 7.30 (2H, m); 4.54 (2H, s); 3.76 (2H, m); 3.27 (3H, s); 2.92 ( 1H, dt, *J* = 5.8, 4.4); 2.74 (1H, dt, *J* = 6.6,4.4); 2.42 (3H, s); 1.75 (2H, m); 1.25 (6H, m); 0.84 (3H, m,). **13C-NMR**  (CDCl3, 50 MHz): 146.0; 143.1; 129.9; 127.3; 108.0; 95.6; 56.5; 53.9; 36.2; 31.0; 25.1; 23.0; 21.8; 15.6; 14.0. **MS** *m/z(%)*; 210 (37); 186 (28, M+-Ts); 155 (35, Ts); 140 (8); 91 (100); 69 (16); 65 ( 39); 55 (18); 54 (31).

**Diethyl (2*R*,3*S*)-2-hydroxy-3-bromosuccinate**. To l-diethyl tartrate (50.0 g, 242 mmol) precooled at 0°C, a 30% solution of HBr in AcOH (145 mL, 726 mmol of HBr) was added dropwise. The reaction mixture was stirred at 25 °C for 24 h before it was poured into ice-water and extracted with Et2O. The organic layers were washed with H2O, brine and dried over Na2SO4. Evaporation of the solvent gave 56.0 g as a mixture of 2-acetoxy-3-bromosuccinate and 2-hydroxy-3-bromosuccinate (respectively 135 mmol and 52 mmol determined *via* 1H-NMR), that was dissolved in 237 mL of absolute EtOH. A 30% solution of HBr in AcOH (14 mL, 79 mmol of HBr) was added and the reaction mixture was refluxed for 20 h. The solvent was evaporated under reduced pressure giving 55.1 g (85%) of crude hydroxy bromosuccinate as a yellow oil. This was employed for the next step without further purification.

**Acetoxy bromosuccinate. 1H NMR** (CDCl3, 200MHz): 5.58 (1H, d, *J*=5.6); 4.77 (1H, d, *J*=5.5); 4.26 (4H, q, *J*=7.0); 2.16 (3H, s); 1.29 (6H, t, *J*=7.0). **MS** m/z(%): 267 and 265 (3, M+ - OCH2CH3); 239 and 237 (7, M+ - COOCH2CH3); 197 and 195 (9); 175 (17); 145 (19); 117 (100); 99 (19); 89 (36); 71 (41).

**Hydroxy bromosuccinate. 1H NMR** (CDCl3, 200MHz): 4.67 (2H, m ); 4.25 (4H, q, *J*=7.0); 1.30 (6H, t, *J*=7.0). **MS** m/z(%): 225 and 223 (1, M+ - OCH2CH3); 197 and 195 (31, M+ - COOCH2CH3); 169 and 167 (24); 151 and 149 (15); 123 (13); 117 (16); 89 (33); 71 (100).

**Diethyl (2*R*,3*R*)-oxirane-2,3-dicarboxylate**. An ice-cooled solution of NaOEt (from 5.38 g, 234 mmol of Na) in absolute EtOH (122 mL) was added dropwise to a stirred solution of diethyl (2*R*,3*S*)-2-hydroxy-3-bromosuccinate (55.1 g, 180 mmol) in EtOH (44 mL) cooled at 0°C. The mixture was stirred for 3 h at rt, neutralised with AcOH and concentrated under reduced pressure. The residue was diluted with precooled H2O (200 mL) and extracted with Et2O. The collected organic layers were washed with H2O, brine, dried and evaporated, giving 26.47 g (78%) of crude oxirane as an orange oil. **1H NMR** (CDCl3, 200MHz): 4.24 (2H, q, *J*=7.1); 4.23 (2H, q, *J*=7.1); 3.63 (2H, s); 1.29 (6H, t, *J*=7.2). **MS** m/z(%): 161 (2); 143 (3, M+ - OCH2CH3); 132 (2); 115 (73, M+ - COOCH2CH3); 87 (100); 71 (32); 70 (28); 69 (32); 59 (16).

**Diethyl (2*R*,3*S*)-2-hydroxy-3-azidosuccinate, diethyl (2*R*,3*R*)-2-hydroxy-3-azidosuccinate**. Me3SiN3 (23.0 mL, 175 mmol) and absolute EtOH (10.4 mL, 175 mmol) were added sequentially to a stirred solution of diethyl (2*R*,3*R*)-oxirane-2,3-dicarboxylate (16.45 g, 87.5 mmol) in dry DMF (125 mL) cooled at 0°C under N2. The reaction mixture was refluxed for 14 h, before EtOH was evaporated under reduced pressure. The solution of diasteroisomers (2*R*,3*S*) and (2*R*,3*R*) (75:25 determined *via* 1H-NMR) in DMF (125 mL) was employed for the next step.

**(2*R*,3*S*): 1H NMR** (CDCl3, 200MHz): 4.60 (1H, d, *J*=2.8); 4.35-4.10 (5H, m); 3.65 (1H, bs); 1.28 (3H, t, *J*=7.2); 1.27 (3H, t, *J*=7.1).

**(2*R*,3*R*): 1H NMR** (CDCl3, 200MHz): 4.73 (1H, d, *J*=3.0); 4.35-4.10 (5H, m); 3.65 (1H, bs); 1.28 (3H, t, *J*=7.2); 1.27 (3H, t, *J*=7.1).

**Diethyl (2*R*,3*S*)-2-hydroxy-3-aminosuccinate, diethyl (2*R*,3*R*)-2-hydroxy-3-aminosuccinate**. PPh3 (23.0 g, 87.5 mmol) was slowly added under N2 to a stirred solution of diethyl (2*R*,3*S*)-2-hydroxy-3-azidosuccinate and diethyl (2*R*,3*R*)-2-hydroxy-3-azidosuccinate (75:25, 87.5 mmol) in DMF (300 mL) cooled at 0°C. After stirring 2 h at 25 °C, the reaction mixture was refluxed for 3 hours. The solution of amino alcohols (2*R*,3*S*) and (2*R*,3*R*) (75:25 determined *via* 1H-NMR) in DMF (300 mL) was employed for the next step without further purification.

**(2*R*,3*S*): 1H NMR** (CDCl3, 200MHz): 4.50 (1H, d, *J*=2.8); 4.22 (4H, q, *J*=7.4); 3.91 (1H, d, *J*=2.8); 3.05 (1H, bs); 2.60 (2H, bs); 1.25 (6H, t, *J*=7.0). **MS** m/z(%): 132 (50, M+ - COOCH2CH3); 114 (2); 103 (12); 102 (100); 86 (4); 74 (63); 70 (8); 58 (53).

**(2*R*,3*R*): 1H NMR** (CDCl3, 200MHz): 4.61 (1H, d, *J*=2.6); 4.22 (4H, q, *J*=7.4); 3.85 (1H, d, *J*=2.2); 3.05 (1H, bs); 2.60 (2H, bs);1.25 (6H, t, *J*=7.0). **MS** m/z(%): 132 (50, M+ - COOCH2CH3); 114 (2); 103 (12); 102 (100); 86 (4); 74 (63); 70 (8); 58 (53).

**Diethyl (2*R*,3*S*)-2-hydroxy-3-(N-*p*-toluenesulfonyl)aminosuccinate, diethyl (2*R*,3*R*)-2-hydroxy-3-(N-*p*-toluenesulfonyl)aminosuccinate**. To a solution of diethyl (2*R*,3*S*)-2-hydroxy-3-aminosuccinate and diethyl (2*R*,3*R*)-2-hydroxy-3-aminosuccinate (75:25, 87.5 mmol) in DMF (300 mL) at 0°C, 4-(dimethylamino)pyridine (1.07 g, 8.75 mmol), triethylamine (24.4 mL ,175 mmol) and *p*-toluenesulfonyl chloride (18.35 g, 96.25 mmol) were added under N2. The reaction mixture was stirred at 25 °C for 24 h and then washed with petroleum ether to precipitate OPPh3. The mixture was filtered to remove OPPh3 before sat NaHCO3 and CH2Cl2 were added. The aqueous phase was extracted with CH2Cl2 and the organic layers collected, washed with 5% HCl, H2O, brine, dried and the solvent was then removed under vacuum. The crude was purified by flash chromatography (petroleum ether : AcOEt, 2:1) giving 11.25 g (35%) as a mixture of diastero isomers (2*R*,3*S*) and (2*R*,3*R*) (71:29 determined *via* 1H-NMR) as a yellow oil.

**(2*R*,3*S*): 1H NMR** (CDCl3, 200MHz): 7.76 (2H, d, *J*=8.4); 7.30 (2H, d, *J*=8.4); 5.55 (1H, d, *J*=8.4); 4.84 (1H, bs); 4.48 (1H, d, *J*=2.6); 4.38 (1H, dd, *J*=8.0, 2.6); 4.27 (2H, q, *J*=7.4); 4.05 (1H, q, *J*=7.4); 4.04 (1H, q, *J*=7.0); 2.42 (3H, s); 1.31 (3H, t, *J*=7.4); 1.14 (3H, t, *J*=7.4). **MS** m/z(%): 286 (6, M+ - COOCH2CH3); 256 (31); 212 (1); 184 (3); 155 (88, Ts); 139 (6); 91 (100, C7H7+); 65 (22); 58 (15).

**(2*R*,3*R*): 1H NMR** (CDCl3, 200MHz): 7.70 (2H, d, *J*=8.4); 7.28 (2H, d, *J*=8.0); 5.42 (1H, d, *J*=10.4); 4.84 (1H, bs); 4.57 (1H, d, *J*=2.2); 4.37 (1H, dd, J=10.2, 2.2); 4.24 (2H, q, *J*=7.0); 4.02 (2H, q, *J*=7.0); 2.40 (3H, s); 1.32 (3H, t, *J*=7.4); 1.11 (3H, t, *J*=7.4). **MS** m/z(%): 286 (6, M+ - COOCH2CH3); 256 (31); 212 (1); 184 (3); 155 (88, Ts); 139 (6); 91 (100, C7H7+); 65 (22); 58 (15).

**Diethyl (2*S*,3*S*)-(N-*p*-toluenesulfonyl)aziridine-2,3-dicarboxylate, diethyl (2*S*,3*R*)-(N-*p*-toluenesulfonil)-aziridine-2,3-dicarboxylate**. The mixture of diethyl (2*R*,3*S*)-2-hydroxy-3-(N-*p*-toluenesulfonyl)aminosuccinate and diethyl (2*R*,3*R*)-2-hydroxy-3-(N-*p*-toluenesulfonyl)aminosuccinate (1.61 g, 4.48 mmol, respectively 71:29) was dissolved in 64 mL of anhydous THF before PPh3 (1.17 g, 4.48 mmol) and diethyl azodicarboxylate (0.7 mL, 4.48 mmol) were added under N2. The reaction mixture was stirred at 25 °C for 30 min and then the solvent evaporated under reduced pressure. The crude was purified by flash chromatography (petroleum ether : AcOEt, 2:1) giving 514 mg (48%) of aziridine (2*S*,3*S*) and 220 mg (50%) of aziridine (2*S*,3*R*) as yellow oils.

**(2*S*,3*S*): 1H NMR** (CDCl3, 200MHz): 7.85 (2H, d, *J*=8.4); 7.33 (2H, d, *J*=8.2); 4.25 (4H, q, *J*=7.1); 3.78 (2H, s); 2.43 (3H, s); 1.30 (6H, t, *J*=7.1). **13C NMR** (CDCl3, 50MHz): 164.8; 144.7; 136.4; 129.6; 127.6; 62.6; 43.2; 21.7; 13.9. **MS** m/z(%): 224 (5); 186 (21, M+ -Ts); 158 (14); 155 (19, Ts); 139 (4); 130 (38); 114 (5); 92 (10); 91 (100, C7H7+); 89 (8); 86 (21); 84 (15), 75(12); 65 (37); 57(7).

**(2*S*,3*R*): 1H NMR** (CDCl3, 200MHz): 7.89 (2H, d, J=8.4); 7.36 (2H, d, J=8.4); 4.18 (4H, q, J=7.1); 3.55 (2H, s); 2.45 (3H, s); 1.23 (6H, t). **13C NMR** (CDCl3, 50MHz): 164.1; 145.0; 133.4; 129.8; 128.3; 62.3; 40.6; 21.7; 13.9. **MS** m/z(%): 224 (5); 186 (21, M+ -Ts); 158 (14); 155 (19, Ts); 139 (4); 130 (38); 114 (5); 92 (10); 91 (100, C7H7+); 89 (8); 86 (21); 84 (15), 75(12); 65 (37); 57(7).

**(2*S*,3*S*)-2,3-Bis(hydroxymethyl)-1-(N-*p*-toluenesulfonyl)aziridine**. To a 2M solution of BH3.SMe2 in THF (2.5 mL, 5 mmol) a solution of diethyl (2*S*,3*S*)-(N-*p*-toluenesulfonyl)aziridine-2,3-dicarboxylate and diethyl (2*S*,3*R*)-(N-*p*-toluenesulfonil)-aziridine-2,3-dicarboxylate (682 mg, 2 mmol, respectively 70:30) in anhydrous THF (3.5 mL) was slowly added under N2. The reaction mixture was refluxed for 6 h before AcOEt and a 0.1M solution of NaOH were added. The aqueous phase was extracted with AcOEt and the organic layers were washed with brine and dried. Evaporation of the solvent gave 500 mg (97%) of the crude as a mixture of diastero isomers (2*S*,3*S*) and (2*S*,3*R*) (70:30 determined *via* 1H-NMR).

**(2*S*,3*S*). 1H NMR** (CDCl3, 200MHz): 7.80 (2H, d, *J*=8.0); 7.34 (2H, d, *J*=8.0); 3.84-3.70 (4H, m); 3.46 (1H, bs); 3.22-3.12 (2H, m); 2.43 (3H, s). **13C NMR** (CDCl3, 50MHz): 144.3; 136.7; 129.5; 127.0; 60.2; 47.5; 21.3.

**(2*S*,3*S*)-2,3-Bis-[(methoxymethoxy)methyl]-1-(N-*p*-toluenesulfonyl)aziridine 9c**. To a solution of (2*S*,3*S*)-2,3-bis(hydroxymethyl)-1-(N-*p*-toluenesulfonyl)aziridine and (2*S*,3*R*)-2,3-bis(hydroxymethyl)-1-(N-*p*-toluenesulfonyl)aziridine (250 mg, 0.97 mmol, respectively 70:30) in CH2Cl2 (2 mL) at 0°C, *N*,*N*-diisopropylethylamine (0.35 mL, 2 mmol) and Chloromethyl methyl ether (0.15 mL, 2 mmol) were added under N2. The mixture was stirred at room temperature for 3 h and then washed with an aqueous solution of 10% HCl, sat NaHCO3 and Brine. The organic layer was dried over anhydrous Na2SO4. The solvent was evaporated and the crude obtained (253 mg, 76%) as a mixture of diastero isomers (2*S*,3*S*) and (2*S*,3*R*) (70:30 determined *via* 1H-NMR) as a yellow oil. **(2*S*,3*S*), 9c: 1H NMR** (CDCl3, 200MHz): 7.86 (2H, d, *J*=8.0); 7.30 (2H, d, *J*=8.2); 4.57 (4H, s); 3.61 (4H, m); 3.29 (6H, s); 3.40-3.25 (2H, m); 2.43 (3H, s). **13C NMR** (CDCl3, 50MHz): 144.5; 134.7; 129.5; 128.0; 96.2; 63.9; 55.3; 42.0; 21.6. **MS** m/z(%): 314 (3, M+ - OCH3); 270 (2); 238 (5); 210 (79); 155 (54, Ts); 139 (7); 114 (38); 100 (25); (91 (100, C7H7+); 65 (26). Anal. Calcd for C15H23NO6S: C, 52.16; H, 6.71; N, 4.06. Found: C, 52.22; H, 6.62; N, 4.00.

**(2*R*,3*R*)-4-Phenyl-2,3-epoxy-1-butanol**. Molecular sieves 4 Å (1.26 g), CH2Cl2 (50 mL), (D)-(-)-diethyl tartrate (0.42 mL, 2.43 mmol) and Ti(O*i*Pr)4 (0.60 mL, 2.01 mmol) were mixed under N2 and cooled to –23°C. *t*BuOOH (5.9 mL of a 5.5 M solution in decane, dried over molecular sieves 4 Å, 32.28 mmol) was then slowly added and the mixture maintained at –23°C for 30 min before (*E*)-4-phenyl-but-2-en-1-ol (1.99 g, 13.45 mmol) in CH2Cl2 (7 mL) was slowly added. After 48 h a solution obtained by dissolving 33 g of FeSO4.7H2O and 11 g citric acid in 100 mL of H2O and cooled at 0°C was added and the mixture warmed up to room temperature. The two phases, which were formed after stirring, were separated; the water phase was extracted with Et2O and the organic phases were added to a solution obtained by dissolving 5 g of NaCl and 30 g of NaOH in 90 mL of H2O. After 1h of vigorous stirring the two phases were separated, the water phase was extracted with Et2O and the organic layers were combined and dried. Evaporation of the solvent gave 1.83 g of the desired product (83%, 97% ee determined *via* Mosher ester). **1H NMR** (CDCl3, 200MHz): 7.45-7.10 (5H, m); 3.89 (1H, bd, *J*=12.6); 3.61 (1H, bd, *J*=12.6); 3.22 (1H, td, *J*=5.6, 2.2); 3.04-2.98 (1H, m); 2.96-2.90 (2H, m [ps-d]); 2.45 (1H, bs).

**(2*R*,3*R*)-1-Methoxymethoxy-2,3-epoxy-4-phenylbutane 10b**. To a solution of (2*R*,3*R*)-4-phenyl-2,3-epoxy-1-butanol (1.82 g, 11 mmol) in CH2Cl2 (25 mL) at 0°C, *N*,*N*-diisopropylethylamine (3.80 mL, 22 mmol) and chloromethyl methyl ether (1.25 mL, 16.6 mmol) were added under N2. The mixture was stirred at room temperature for 14 h and then washed with an aqueous solution of 10% HCl, sat NaHCO3 and brine. The organic layer was dried over anhydrous Na2SO4. The solvent was evaporated and the crude oxiranyl ether **10b** obtained (2.04 g, 89%) as a yellow oil. **1H NMR** (CDCl3, 200MHz): 7.40-7.10 (5H, m); 4.62 (2H, s); 3.73 (1H, dd, *J*=11.8, 3.6); 3.54 (1H, dd, *J*=11.8, 5.6); 3.34 (3H, s); 3.10 (1H, ps-td, *J*=5.6, 2.2); 3.04-2.96 (1H, m); 2.92-2.86 (2H, m).

**(2*S*,3*S*)-1-Methoxymethoxy-2-hydroxy-3-azido-4-phenylbutane, (2*S*,3*R*)-1-methoxymethoxy-2- azido-3-hydroxy-4-phenylbutane 11b**. To the oxiranyl ether **10b** (1.94 g, 9.3 mmol) in 2-methoxyethanol : water, 8:1 (63 mL), NaN3 (3.63 g, 55.8 mmol) and NH4Cl (1.00 g, 18.6 mmol) were added under N2. The mixture was stirred at 80°C for 6 h before H2O and Et2O were added. The water phase was extracted with Et2O and the organic layers were collected, washed with H2O and dried. Evaporation of the solvent gave 1.88 g (80%) as a mixture of regioisomeric azido alcohols **11b** as a brown oil. **MS** m/z(%): 177 (2, M+ - OH - N3 - CH3); 161 (2, M+ - OH - N3 - OCH3); 146 (3); 133 (5); 105 (17); 91 (100, C7H7+); 73 (42); 65 (32).

**(2*R*,3*S*)-2-Methoxymethoxymethyl-3-benzylaziridine 12b**. A mixture of (2*S*,3*S*)-1-methoxymethoxy-2-hydroxy-3-azido-4-phenylbutane and (2*S*,3*R*)-1-methoxymethoxy-2- azido-3-hydroxy-4-phenylbutane (1.74 g, 6.9 mmol), anhydrous toluene (30 mL) and triphenylphosphine (2.18 g, 8.3 mmol) was refluxed under N2 for 24 h. After removing the solvent under reduced pressure, the residue was dissolved in CH2Cl2 and filtered over Celite® to remove OPPh3. The filtrated was evaporated giving 1.48 g (quantitative) of crude aziridine **12b**. **1H NMR** (CDCl3, 200MHz): 7.50-7.10 (5H, m); 4.60 (2H, s); 3.68 (1H, dd, *J*= 12.0, 5.3); 3.47 (1H, dd, *J*=12.0, 4.0); 3.40 (1H, m); 3.33 (3H, s); 2.80 (2H, m); 2.20-2.00 (2H, m).

**(2*R*,3*S*)-2-Methoxymethoxymethyl-1-*p*-toluenesulfonyl-3-benzylaziridine 9b**. To a solution of (2*R*,3*S*)-2-[(metoxymetoxy)methyl]-3-benzylaziridine **12b** (1.55 g, 7.48 mmol) in CH2Cl2 (40 ml) at 0°C, 4-(dimethylamino)pyridine (170 mg, 0.7 mmol), triethylamine (2.1 mL ,15 mmol) and *p*-toluenesulfonyl chloride (2.16 g, 11.3 mmol) were added under N2. The reaction mixture was stirred at 25 °C for 12 h before H2O was added. The water phase was then extracted with CH2Cl2 and the organic layers were collected and washed with H2O, brine and dried. The solvent was evaporated under reduced pressure and the crude was then purified by flash chromatography (Petroleum ether:AcOEt, 4:1) affording 1.24 g (46%) of **9b** as a yellow oil. **1H NMR** (CDCl3, 200MHz): 7.74 (2H, d, *J*=8.2); 7.15-7.00 (7H, m), 4.52 (2H, s); 3.79 (2H, m); 3.25 (3H, s); 3.10-3.00 (4H, m); 2.43 (3H, s). **13C NMR** (CDCl3, 50MHz): 143.8; 137.3; 137.2; 129.3; 128.5; 128.4; 127.4; 126.5; 96.3; 65.6; 55.2; 47.6; 47.2; 35.6; 21.5. **MS** m/z(%): 286 (8, M+ - CH2OMOM); 270 (6, M+ - C7H7+); 210 (11); 194 (3); 174 (6);155 (8, Ts); 146 (24); 139 (44); 138 (17); 129 (13); 117 (9); 104 (14); 91 (100, C7H7+); 77 (30); 65 (49); 54 (56).

# 2.Isomerization of Aziridinyl Ethers.

**General Procedure. Reaction with LIDAKOR.** To a 1.5M solution of BuLi in hexane (2 eq) cooled at 0°C, dry pentane (to obtain a 0.2M solution of aziridine), diisopropylamine (2 eq) and potassium *tert*-butoxide (2 eq) were added under N2. The mixture was stirred at 25°C for 30 min before aziridinyl ether was added and allowed to react until the end of the reaction (determined *via* TLC) then H2O and Et2O were added. The aqueous phase was extracted with Et2O and the organic layers were collected and washed with brine and dried. Evaporation of the solvent gave the crude product which was then purified by flash chromatography.

**(1*E*)-(3*R*)-1-Methoxymethoxy-3-N-*p*-toluenesulfonylamino-1-octene 13a.** The general procedure was used on aziridine **9a**, obtaining 1.21 g (78%) of a crude product which was then purified by flash chromatography (petroleum ether : AcOEt, 4:1) giving 864 mg (56%) of pure **13a**. **1H NMR** (CDCl3, 200MHz): 7.73 (2H, m); 7.28 (2H, m); 6.09 (1H, dd, *J*=12.5, 0.8); 4.68 (1H, dd, *J*=12.5, 4.7); 4.62 (2H, s); 4.58–4.42 (1H, m); 3.80-3.46 (1H, m); 3.29 (3H, s); 2.41 (3H, s); 1.6-1.0 (8H, m); 0.88 (3H, m). **13C NMR** (CDCl3, 50MHz): 145.9; 143.0; 138.4; 129.1; 127.2; 107.8; 95.5; 55.7; 53.2; 36.5; 31.2; 25.1; 22.4; 21.4; 13.9. **MS** m/z(%): 254(10); 210 (91); 187 (71, M+-91); 171 (5, NH2Ts); 155 (83, Ts); 140 (19); 91 (100); 84 (53); 69 (15); 68 (24); 65 (15); 57 (13). Anal. Calcd for C17H27NO4S: C, 59.80; H, 7.97; N, 4.10. Found: C, 59.72; H, 7.82; N, 3.99.

**(1*E*)-1,4-Bis-methoxymethoxy-3-N-*p*-toluenesulfonylamino-1-butene 13c.** The general procedure was modified using 4 eq of base and 20% of HMPA to dissolve the aziridine **9c**, obtaining a crude product which was then purified by flash chromatography (petroleum ether : AcOEt, 1:1) giving 37 mg (51%) of pure **13c**. **1H NMR** (CDCl3, 200MHz): 7.73 (2H, d, *J*=8.6); 7.29 (2H, d, *J*=8.6); 6.25 (1H, d, *J*=12.6); 5.07 (1H, d, *J*=6.4); 4.80 (1H, dd, *J*=13.0, 8.6); 4.66 (2H, s); 4.54 (2H, s); 4.50-4.40 (1H, m), 3.60-3.40 (2H, m); 3.32 (3H, s); 3.28 (3H, s); 2.41 (3H, s). **MS** m/z(%): 314 (2, M+ - OCH3); 300 (4, M+ - MOM); 258 (26); 226 (24); 184 (3); 155 (33); 91 (100); 57 (100). Anal. Calcd for C15H23NO6S: C, 52.16; H, 6.71; N, 4.06. Found: C, 52.02; H, 6.82; N, 4.11.

**(3*E*)-(2*R*)-1-Methoxymethoxymethyl-4-phenyl-2-(N-*p*-toluenesulfonyl)ammino-3-butene 16.** The general procedure was used on aziridine **9b**, obtaining a crude product which was then purified by flash chromatography (petroleum ether : AcOEt, 3:2) giving 76 mg (70%) of pure **16**. **1H NMR** (CDCl3, 200MHz): 7.73 (2H, d, *J*=8.6); 7.30-7.10 (7H, m); 6.39 (1H, d, *J*=15.8); 5.86 (1H, dd, *J*=15.8, 7.4); 5.21 (1H, d, *J*=7.0); 4.56 (2H, s); 4.12 (1H, m); 3.58 (2H, d, *J*=4.8); 3.32 (3H, s); 2.33 (3H, s). **13C NMR** (CDCl3, 50MHz): 143.3; 138.0; 136.1; 132.7; 129.5; 128.4; 127.9; 127.3; 126.4; 125.8; 96.7; 70.5; 55.7; 55.5; 21.4. **MS** m/z(%): 300 (1, M+ - OMOM); 286 (64, M+ - CH2OMOM); 206 (2); 226 (1); 184 (3); 176 (4); 155 (33); 145 (6); 130 (33); 115 (25); 103 (7); 91 (100); 77 (1); 65 (23). Anal. Calcd for C19H23NO4S: C, 63.14; H, 6.41; N, 3.88. Found: C, 63.02; H, 6.32; N, 3.91.

**3.Elaboration of Amino Vinyl Ethers.**

**(3*R*)-3-N-*p*-Toluenesulfonylammino-1-octanal 14.** To a solution of **13a** (68 mg, 0.2 mmol) in CH2Cl2 (2 mL) at -78°C, Bu4NI (74 mg, 0.2 mmol) and Me3SiCl (0.17 mL, 0.2 mmol) were added under N2. The reaction mixture was stirred at –20°C for 24 h, before sat NHCO3 (1 mL) and THF (3 mL) were added. The mixture was stirred for 10 min and then extracted with Et2O, washed with brine, dried and evaporate. The crude was purified by flash chromatography (petroleum ether : AcOEt, 2:1) giving 34 mg (56%) of pure aldehyde **14**. **1H NMR** (CDCl3, 200MHz): 9.64 (1H, s); 7.74 (2H, m); 7.29 (2H, m); 4.82 (1H, d, *J*=8.4); 3.57 (1H, m); 2.62 (2H, m); 2.42 (3H, s); 1.42 (2H, m); 1.30-1.00 (6H, m); 0.79 (3H, t, *J*=6.0). **13C NMR** (CDCl3, 50MHz): 205.0; 143.5; 138.0; 130.0; 127.0; 49.5; 38.0; 35.0; 31.0; 25.0; 23.0; 21.0; 14.0. **MS** m/z (%): 254 (7, M+-CH2COH); 226 (20); 207 (3); 172 (24); 155 (82); 142 (10); 91 (100); 65 (6). Anal. Calcd for C15H23NO3S: C, 60.58; H, 7.79; N, 4.71. Found: C, 60.32; H, 7.842; N, 4.61.

**(3*R*)-3-N-*p*-Toluenesulfonyl-octanoic acid 15**. To a solution of aldehyde **14** (49 mg, 0.16 mmol) in MeCN : H2O, 3:1 (0.8 mL) at 0°C, 0.94 mL of a solution obtained dissolving H5IO6 (5.7 g) and CrO3 (11.5 mg) in MeCN : H2O, 3:1 (5.7 mL) was slowly added. The reaction mixture was stirred for 6 h before aq Na2HPO4 (4 mL) and toluene (4 mL) were added. The organic phase was washed with a solution of brine : H2O, 1:1, aq NaHSO3 and brine. After evaporation of the solvent the crude was purified on silica gel (petroleum ether : AcOEt, 1:1) affording 26 mg (52%) of pure acid **15**. **1H NMR** (CDCl3, 200MHz): 7.77 (2H, d, *J*=8.4); 7.29 (2H, d, *J*=8.4); 5.40-4.80 (1H, bs); 3.49 (1H, m); 2.48 (2H, d, *J*=5.2); 2.42 (3H, s); 1.45 (2H, m); 1.40-1.00 (6H, m); 0.81 (3H, m). **13C NMR** (CDCl3, 50MHz): 173.7; 141.1; 135.5; 127.8; 124.5; 46.5; 38.2; 32.1; 28.5; 22.3; 20.0; 19.7; 11.8. Anal. Calcd for C15H23NO4S: C, 57.48; H, 7.40; N, 4.47. Found: C, 57.60; H, 7.62; N, 4.41.
